# Supplementary material for: Lipid Exchange Mechanism of the Cholesteryl Ester Transfer Protein Clarified by Atomistic and Coarse-grained Simulations
Source: PLOS journal article supplement (doi:10.1371/journal.pcbi.1002299), 2012-01-12
Supplement: S4 (10.1371/journal.pcbi.1002299.s004) [file journal.pcbi.1002299.s004]

Figure S2 shows intrinsic protein contacts as a function of simulation time for simulations A1, A2, and A3, indicating that without interior lipids (A1) the volume of the hydrophobic tunnel of CETP is smaller than with CETP-bound lipids (A2 and A3).

**Figure S2.** Number of protein-protein contacts in simulations A1, A2, and A3.
